# Supplementary material for: Trechus (Coleoptera: Carabidae) of Appalachia: A Phylogenetic Insight into the History of High Elevation Leaf Litter Communities
Source: MDPI journal article supplement (doi:10.3390/d16040212), 2024-03-30
Supplement: s1 [file s1]

**Supplementary Table S1: GenBank accession numbers** Alignment information can be found at DOI: 10.5061/dryad.kh18932fk.  
Quotations indicate that the identification was made without consulting types due to unavailability. Extraction numbers are provided for those extracted in house and are the isolate numbers in GenBank.

| Extraction Number | Identification |                           | COI      | Wingless | Topo     | 18S      | 28S      | CAD4     |
|-------------------|----------------|---------------------------|----------|----------|----------|----------|----------|----------|
| CH153             | <i>Trechus</i> | <i>obtus</i>              | OR169029 | PP681466 | PP681611 | PP707761 | PP571911 |          |
| MSC2548           | <i>Trechus</i> | <i>aduncus</i>            | OR169957 | PP681531 | PP681617 |          |          |          |
| MSC2549           | <i>Trechus</i> | <i>pisgahensis</i>        | OR169958 | PP681515 |          |          |          |          |
| MSC2578           | <i>Trechus</i> | <i>hydropicus</i>         | OR169980 |          |          |          |          |          |
| MSC2579           | <i>Trechus</i> | <i>beutenmuelleri</i>     | OR169981 |          |          |          |          |          |
| MSC2624           | <i>Trechus</i> | <i>hydropicus</i>         | OR170012 | PP681539 | PP681619 | PP707764 | PP571925 |          |
| MSC2625           | <i>Trechus</i> | <i>beutenmuelleri</i>     | OR170013 |          |          |          |          |          |
| MSC2626           | <i>Trechus</i> | <i>satanicus</i>          | OR170014 |          |          |          |          |          |
| MSC2627           | <i>Trechus</i> | <i>satanicus</i>          | OR170015 | PP681538 |          |          |          | PP681628 |
| MSC2628           | <i>Trechus</i> | <i>nebulosus</i>          | OR170016 | PP681567 | PP681621 | PP707767 | PP571931 |          |
| MSC2629           | <i>Trechus</i> | <i>bowlingi</i>           | OR170017 |          |          |          |          |          |
| MSC2630           | <i>Trechus</i> | <i>bowlingi</i>           | OR170018 | PP681507 |          |          |          |          |
| MSC2631           | <i>Trechus</i> |                           | OR170019 | PP681556 |          |          |          |          |
| MSC2632           | <i>Trechus</i> | <i>luculentus</i>         | OR170020 | PP681555 |          |          |          |          |
| MSC2633           | <i>Trechus</i> | <i>luculentus</i>         | OR170021 | PP681563 |          |          |          |          |
| MSC2634           | <i>Trechus</i> | <i>nebulosus</i>          | OR170022 | PP681553 |          |          | PP571929 |          |
| MSC2635           | <i>Trechus</i> | <i>“clingmanensis”</i>    | OR170023 | PP681568 |          |          | PP571932 |          |
| MSC2636           | <i>Trechus</i> | <i>novaculosus</i>        | OR170024 | PP681527 | PP681615 |          | PP571922 |          |
| MSC2637           | <i>Trechus</i> | <i>thunderheadensis</i>   | OR170025 | PP681493 |          |          | PP571915 | PP681627 |
| MSC2638           | <i>Trechus</i> | <i>bowlingi</i>           | OR170026 |          |          |          |          |          |
| MSC2639           | <i>Trechus</i> | <i>bowlingi</i>           | OR170027 | PP681564 |          |          |          |          |
| MSC2640           | <i>Trechus</i> | <i>nebulosus</i>          | OR170028 | PP681593 | PP681624 | PP707770 | PP571942 | PP681631 |
| MSC2641           | <i>Trechus</i> | <i>hydropicus canus</i>   | OR170029 | PP681529 | PP681616 |          | PP571923 |          |
| MSC2643           | <i>Trechus</i> | <i>plottbalsamensis</i>   | OR170031 | PP681491 |          |          |          |          |
| MSC2644           | <i>Trechus</i> | <i>barberi</i>            | OR170032 | PP681602 |          |          |          |          |
| MSC2645           | <i>Trechus</i> |                           | OR170033 | PP681591 |          |          | PP571941 |          |
| MSC2646           | <i>Trechus</i> | <i>hydropicus</i>         | OR170034 |          |          |          |          |          |
| MSC2647           | <i>Trechus</i> | <i>beutenmuelleri</i>     | OR170035 | PP681588 |          |          |          |          |
| MSC2648           | <i>Trechus</i> | <i>hydropicus</i>         | OR170036 | PP681600 |          |          |          |          |
| MSC2649           | <i>Trechus</i> | <i>beutenmuelleri</i>     | OR170037 | PP681530 |          |          |          |          |
| MSC2650           | <i>Trechus</i> | <i>mitchellensis</i>      | OR170038 | PP681476 |          | PP707762 | PP571912 | PP681626 |
| MSC2651           | <i>Trechus</i> | <i>“plottbalsamensis”</i> | OR170039 | PP681551 | PP681620 | PP707766 | PP571928 | PP681629 |
| MSC2654           | <i>Trechus</i> | <i>balsamensis</i>        | OR170042 | PP681580 | PP681622 | PP707768 | PP571937 |          |
| MSC2655           | <i>Trechus</i> | <i>wayahbaldensis</i>     | OR170043 |          |          |          |          |          |
| MSC2656           | <i>Trechus</i> | <i>vandykei</i>           | OR170044 |          |          |          |          |          |
| MSC2658           | <i>Trechus</i> | <i>vandykei</i>           | OR170046 | PP681608 |          |          | PP571949 |          |
| MSC2660           | <i>Trechus</i> | <i>hydropicus canus</i>   | OR170048 | PP681594 |          |          |          |          |

| Extraction Number | Identification | COI                              | Wingless | Topo     | 18S      | 28S      | CAD4     |
|-------------------|----------------|----------------------------------|----------|----------|----------|----------|----------|
| MSC2662           | <i>Trechus</i> | OR170050                         |          |          |          |          |          |
| MSC2663           | <i>Trechus</i> | <i>hydropicus canus</i>          | OR170051 |          |          |          |          |
| MSC2664           | <i>Trechus</i> | <i>hydropicus beutenmuelleri</i> | OR170052 | PP681590 | PP707774 | PP571940 |          |
| MSC2666           | <i>Trechus</i> | <i>hydropicus beutenmuelleri</i> | OR170053 | PP681589 | PP681623 | PP707769 | PP681630 |
| MSC2667           | <i>Trechus</i> |                                  | OR170054 | PP681606 |          |          |          |
| MSC2668           | <i>Trechus</i> | <i>carolinae</i>                 | OR170055 | PP681605 |          |          |          |
| MSC2669           | <i>Trechus</i> | <i>roanicus</i>                  | OR170056 | PP681607 | PP681625 | PP707771 | PP571948 |
| MSC2793           | <i>Trechus</i> |                                  | PP565864 |          |          |          |          |
| MSC2838           | <i>Trechus</i> |                                  | OR170133 |          |          |          |          |
| MSC3002           | <i>Trechus</i> |                                  | OR170267 | PP681492 |          |          |          |
| MSC3279           | <i>Trechus</i> |                                  | OR170450 | PP681489 |          |          |          |
| MSC3342           | <i>Trechus</i> | <i>beutenmuelleri</i>            | OR170499 | PP681587 |          |          |          |
| MSC3401           | <i>Trechus</i> | <i>carolinae</i>                 | OR170543 | PP681604 |          |          |          |
| MSC3455           | <i>Trechus</i> | <i>barberi</i>                   | OR170576 | PP681469 |          |          |          |
| MSC4164           | <i>Trechus</i> | <i>barberi</i>                   | OR170882 |          |          |          |          |
| MSC4165           | <i>Trechus</i> |                                  | OR170883 |          |          |          |          |
| MSC4166           | <i>Trechus</i> | <i>barberi</i>                   | OR170884 |          |          |          |          |
| MSC4173           | <i>Trechus</i> |                                  | OR170891 |          |          |          |          |
| MSC4213           | <i>Trechus</i> | <i>bowlingi</i>                  | OR170927 |          |          |          |          |
| MSC4214           | <i>Trechus</i> | <i>bowlingi</i>                  | OR170928 |          |          |          |          |
| MSC4215           | <i>Trechus</i> | <i>bowlingi</i>                  | OR170929 |          |          |          |          |
| MSC4223           | <i>Trechus</i> | <i>bowlingi</i>                  | OR170935 |          |          |          |          |
| MSC4252           | <i>Trechus</i> | <i>satanicus</i>                 | OR170963 | PP681537 | PP681618 |          |          |
| MSC4292           | <i>Trechus</i> | <i>talequah</i>                  | OR171000 | PP681548 |          | PP707765 | PP571927 |
| MSC4293           | <i>Trechus</i> | <i>haoe</i>                      | OR171001 | PP681509 | PP681613 |          |          |
| MSC5432           | <i>Trechus</i> | <i>barberi</i>                   | OR171601 | PP681473 |          |          |          |
| MSC5433           | <i>Trechus</i> | <i>barberi</i>                   | OR171602 |          |          |          |          |
| MSC5434           | <i>Trechus</i> | <i>subtilis</i>                  | OR171603 | PP681478 | PP681612 | PP707763 | PP571913 |
| MSC5435           | <i>Trechus</i> | <i>pisgahensis</i>               | OR171604 | PP681512 | PP681614 | PP707778 | PP571916 |
| MSC6504           | <i>Trechus</i> | <i>subtilis</i>                  | OR172466 |          |          |          |          |
| MSC7925           | <i>Trechus</i> | <i>valentinei</i>                | OR173294 | PP681570 |          |          | PP571934 |
| PLW0007           | <i>Trechus</i> | <i>tennesseensis</i>             | OR174661 | PP681572 |          |          | PP571935 |
| PLW0008           | <i>Trechus</i> | <i>tennesseensis</i>             | OR174662 | PP681599 |          |          |          |
| PLW0009           | <i>Trechus</i> | <i>balsamensis</i>               | OR174663 | PP681550 |          |          |          |
| PLW0010           | <i>Trechus</i> | <i>balsamensis</i>               | OR174664 | PP681549 |          |          |          |
| PLW0011           | <i>Trechus</i> | <i>subtilis</i>                  | OR174665 | PP681477 |          |          |          |
| PLW0012           | <i>Trechus</i> |                                  | OR174666 | PP681581 |          |          |          |

| Extraction Number | Identification |                           | COI      | Wingless | Topo | 18S      | 28S      | CAD4     |
|-------------------|----------------|---------------------------|----------|----------|------|----------|----------|----------|
| PLW0013           | <i>Trechus</i> | <i>barberi</i>            | OR174667 | PP681475 |      |          |          |          |
| PLW0014           | <i>Trechus</i> |                           |          | PP681474 |      |          |          |          |
| PLW0015           | <i>Trechus</i> | <i>barberi</i>            | OR174668 | PP681467 |      |          |          |          |
| PLW0016           | <i>Trechus</i> | <i>vandykei</i>           | OR174669 | PP681522 |      |          |          |          |
| PLW0017           | <i>Trechus</i> | <i>n.sp.1</i>             | OR174670 | PP681609 |      |          |          | PP681634 |
| PLW0018           | <i>Trechus</i> | <i>n.sp.1</i>             | OR174671 |          |      |          |          |          |
| PLW0019           | <i>Trechus</i> | <i>pisgahensis</i>        | OR174672 | PP681516 |      |          |          |          |
| PLW0020           | <i>Trechus</i> | <i>toxawayi</i>           | OR174673 | PP681534 |      |          |          |          |
| PLW0021           | <i>Trechus</i> | <i>toxawayi</i>           | OR174674 | PP681533 |      |          |          |          |
| PLW0022           | <i>Trechus</i> | <i>toxawayi</i>           | OR174675 | PP681535 |      |          | PP571924 |          |
| PLW0025           | <i>Trechus</i> | <i>hydropicus</i>         | OR174676 |          |      |          | PP571938 |          |
| PLW0026           | <i>Trechus</i> | <i>hydropicus</i>         |          |          |      |          |          |          |
| PLW0026           | <i>Trechus</i> | <i>hydropicus canus</i>   | OR174677 | PP681592 |      |          |          |          |
| PLW0027           | <i>Trechus</i> | <i>Hydropicus</i>         | OR174678 | PP681584 |      | PP707776 |          |          |
| PLW0027           | <i>Trechus</i> | <i>hydropicus</i>         |          |          |      |          |          |          |
| PLW0028           | <i>Trechus</i> | <i>cumberlandus</i>       | OR174679 | PP681597 |      |          |          |          |
| PLW0029           | <i>Trechus</i> | <i>cumberlandus</i>       | OR174680 | PP681598 |      |          | PP571946 |          |
| PLW0030           | <i>Trechus</i> | <i>tobiasi</i>            | OR174681 | PP681573 |      |          |          |          |
| PLW0031           | <i>Trechus</i> | <i>tobiasi</i>            | OR174682 | PP681574 |      |          |          |          |
| PLW0032           | <i>Trechus</i> | <i>tusquitee</i>          | OR174683 | PP681544 |      |          |          |          |
| PLW0033           | <i>Trechus</i> | <i>tusquitee</i>          | OR174684 | PP681545 |      |          |          |          |
| PLW0034           | <i>Trechus</i> | <i>hydropicus avus</i>    | OR174685 | PP681585 |      | PP707775 | PP571939 |          |
| PLW0035           | <i>Trechus</i> | <i>n.sp.2</i>             | PP565865 |          |      |          |          |          |
| PLW0036           | <i>Trechus</i> | <i>n.sp.2</i>             | PP565866 | PP681603 |      | PP707772 | PP571947 |          |
| PLW0037           | <i>Trechus</i> | <i>aduncus</i>            | OR174688 | PP681532 |      |          |          |          |
| PLW0038           | <i>Trechus</i> |                           | OR174689 | PP681583 |      |          |          |          |
| PLW0039           | <i>Trechus</i> | <i>talequah</i>           | OR174690 | PP681546 |      |          |          |          |
| PLW0040           | <i>Trechus</i> | <i>talequah</i>           | OR174691 | PP681547 |      |          |          |          |
| PLW0041           | <i>Trechus</i> | <i>subtilis</i>           | OR174692 |          |      |          |          |          |
| PLW0042           | <i>Trechus</i> | “ <i>pseudosubtilis</i> ” | OR174693 | PP681486 |      |          |          |          |
| PLW0043           | <i>Trechus</i> | “ <i>pseudobarberi</i> ”  | OR174694 |          |      |          |          |          |
| PLW0044           | <i>Trechus</i> | <i>subtilis</i>           | OR174695 | PP681484 |      |          |          |          |
| PLW0045           | <i>Trechus</i> | <i>subtilis</i>           | OR174696 | PP681483 |      |          |          |          |
| PLW0046           | <i>Trechus</i> | “ <i>pseudosubtilis</i> ” | OR174697 | PP681487 |      |          |          |          |
| PLW0047           | <i>Trechus</i> | <i>verus</i>              | OR174698 | PP681577 |      |          |          |          |
| PLW0048           | <i>Trechus</i> | <i>verus</i>              | OR174699 | PP681579 |      |          |          |          |
| PLW0049           | <i>Trechus</i> | “ <i>clingmanensis</i> ”  | OR174700 | PP681552 |      |          |          |          |
| PLW0050           | <i>Trechus</i> | <i>luculentus</i>         | OR174701 | PP681554 |      |          |          |          |
| PLW0051           | <i>Trechus</i> | <i>luculentus</i>         |          |          |      |          |          |          |
| PLW0051           | <i>Trechus</i> | <i>bowlingi</i>           | OR174702 |          |      |          |          |          |
| PLW0052           | <i>Trechus</i> | <i>thunderheadensis</i>   | OR174703 | PP681528 |      |          |          |          |
| PLW0053           | <i>Trechus</i> | <i>thunderheadensis</i>   | OR174704 | PP681526 |      |          |          |          |

| Extraction Number | Identification | COI                       | Wingless | Topo     | 18S | 28S      | CAD4 |
|-------------------|----------------|---------------------------|----------|----------|-----|----------|------|
| PLW0054           | <i>Trechus</i> | OR174705                  | PP681582 |          |     |          |      |
| PLW0055           | <i>Trechus</i> | <i>nebulosus</i>          | OR174706 | PP681561 |     |          |      |
| PLW0056           | <i>Trechus</i> | <i>nebulosus</i>          | OR174707 | PP681562 |     |          |      |
| PLW0057           | <i>Trechus</i> | <i>verus</i>              | OR174708 | PP681578 |     |          |      |
| PLW0058           | <i>Trechus</i> | <i>subtilis</i>           | OR174709 | PP681479 |     |          |      |
| PLW0059           | <i>Trechus</i> |                           | OR174710 | PP681482 |     |          |      |
| PLW0060           | <i>Trechus</i> |                           | OR174711 |          |     |          |      |
| PLW0061           | <i>Trechus</i> | <i>bowlingi</i>           | OR174712 | PP681505 |     |          |      |
| PLW0063           | <i>Trechus</i> | <i>bowlingi</i>           | OR174714 | PP681497 |     |          |      |
| PLW0064           | <i>Trechus</i> | <i>bowlingi</i>           | OR174715 | PP681503 |     |          |      |
| PLW0065           | <i>Trechus</i> | <i>bowlingi</i>           | OR174716 | PP681506 |     |          |      |
| PLW0066           | <i>Trechus</i> | <i>bowlingi</i>           | OR174717 | PP681496 |     |          |      |
| PLW0067           | <i>Trechus</i> | <i>valentinei</i>         | OR174718 |          |     |          |      |
| PLW0068           | <i>Trechus</i> | <i>nebulosus</i>          | OR174719 | PP681566 |     |          |      |
| PLW0069           | <i>Trechus</i> | <i>bowlingi</i>           | OR174720 | PP681501 |     |          |      |
| PLW0070           | <i>Trechus</i> | <i>bowlingi</i>           | OR174721 | PP681494 |     |          |      |
| PLW0071           | <i>Trechus</i> | <i>bowlingi</i>           | OR174722 |          |     |          |      |
| PLW0072           | <i>Trechus</i> | <i>bowlingi</i>           | OR174723 |          |     |          |      |
| PLW0073           | <i>Trechus</i> | <i>bowlingi</i>           | OR174724 |          |     |          |      |
| PLW0074           | <i>Trechus</i> | <i>bowlingi</i>           | OR174725 |          |     |          |      |
| PLW0075           | <i>Trechus</i> | <i>nebulosus</i>          | OR174726 |          |     |          |      |
| PLW0076           | <i>Trechus</i> | <i>bowlingi</i>           | OR174727 |          |     |          |      |
| PLW0077           | <i>Trechus</i> | <i>bowlingi</i>           | OR174728 |          |     |          |      |
| PLW0078           | <i>Trechus</i> | <i>bowlingi</i>           | OR174729 | PP681495 |     |          |      |
| PLW0079           | <i>Trechus</i> | <i>vandykei</i>           | OR174730 | PP681523 |     |          |      |
| PLW0080           | <i>Trechus</i> |                           | OR174731 |          |     |          |      |
| PLW0081           | <i>Trechus</i> |                           | OR174732 |          |     |          |      |
| PLW0082           | <i>Trechus</i> |                           | PP565867 | PP681485 |     |          |      |
| PLW0083           | <i>Trechus</i> | <i>subtilis</i>           | OR174733 | PP681480 |     |          |      |
| PLW0084           | <i>Trechus</i> | <i>subtilis</i>           | OR174734 | PP681481 |     |          |      |
| PLW0085           | <i>Trechus</i> | “ <i>pseudosubtilis</i> ” | OR174735 | PP681488 |     | PP571914 |      |
| PLW0086           | <i>Trechus</i> | <i>valentinei</i>         | OR174736 | PP681569 |     | PP571933 |      |
| PLW0087           | <i>Trechus</i> |                           | OR174737 |          |     |          |      |
| PLW0088           | <i>Trechus</i> | <i>nebulosus</i>          | OR174738 | PP681565 |     |          |      |
| PLW0089           | <i>Trechus</i> | <i>haoe</i>               | OR174739 | PP681508 |     |          |      |
| PLW0090           | <i>Trechus</i> | <i>barberi</i>            | OR174740 | PP681468 |     |          |      |
| PLW0091           | <i>Trechus</i> | <i>satanicus</i>          | OR174741 | PP681536 |     |          |      |
| PLW0092           | <i>Trechus</i> | <i>pisgahensis</i>        | OR174742 | PP681510 |     |          |      |
| PLW0093           | <i>Trechus</i> | <i>pisgahensis</i>        | OR174743 | PP681511 |     |          |      |
| PLW0094           | <i>Trechus</i> | <i>pisgahensis</i>        | OR174744 | PP681517 |     |          |      |
| PLW0095           | <i>Trechus</i> | <i>tusquitee</i>          | OR174745 | PP681540 |     |          |      |
| PLW0096           | <i>Trechus</i> | <i>tusquitee</i>          | OR174746 | PP681541 |     |          |      |

| Extraction Number | Identification | COI                                 | Wingless | Topo     | 18S      | 28S      | CAD4     |
|-------------------|----------------|-------------------------------------|----------|----------|----------|----------|----------|
| PLW0097           | <i>Trechus</i> | <i>bowlingi</i>                     | OR174747 | PP681502 |          |          |          |
| PLW0098           | <i>Trechus</i> | <i>tusquitee</i>                    | OR174748 | PP681542 |          |          |          |
| PLW0099           | <i>Trechus</i> |                                     | OR174749 | PP681543 |          | PP571926 |          |
| PLW0100           | <i>Trechus</i> | <i>hydropicus avus</i>              | OR174750 | PP681586 |          |          |          |
| PLW0101           | <i>Trechus</i> | <i>"pseudosubtilis"</i>             | OR174751 | PP681490 |          |          |          |
| PLW0102           | <i>Trechus</i> | <i>barberi</i>                      | OR174752 | PP681472 |          |          |          |
| PLW0103           | <i>Trechus</i> |                                     | OR174753 | PP681575 |          |          |          |
| PLW0104           | <i>Trechus</i> | <i>tennesseensis</i>                | PP565868 | PP681571 |          |          |          |
| PLW0105           | <i>Trechus</i> | <i>tauricus</i>                     | OR174754 | PP681576 |          | PP571936 |          |
| PLW0106           | <i>Trechus</i> | <i>tuckaleechee</i>                 | OR174755 | PP681514 |          | PP571918 |          |
| PLW0107           | <i>Trechus</i> | <i>pisgahensis</i>                  | OR174756 | PP681601 |          |          |          |
| PLW0108           | <i>Trechus</i> |                                     | OR174757 | PP681498 |          |          |          |
| PLW0109           | <i>Trechus</i> | <i>bowlingi</i>                     | OR174758 | PP681500 |          |          |          |
| PLW0110           | <i>Trechus</i> | <i>bowlingi</i>                     | OR174759 | PP681499 |          |          |          |
| PLW0111           | <i>Trechus</i> | <i>vandykei</i>                     | PP565869 | PP681520 |          | PP571920 |          |
| PLW0117           | <i>Trechus</i> | <i>pisgahensis</i>                  | PP565870 | PP681513 | PP707773 | PP571917 |          |
| PLW0118           | <i>Trechus</i> | <i>vandykei</i>                     | PP565871 | PP681521 |          |          |          |
| PLW0120           | <i>Trechus</i> |                                     | PP565872 | PP681518 |          | PP571919 |          |
| PLW0121           | <i>Trechus</i> | <i>caliginis</i>                    | PP565873 |          |          |          |          |
| PLW0122           | <i>Trechus</i> | <i>inexpectatus</i>                 | PP565874 | PP681524 |          | PP571921 |          |
| PLW0125           | <i>Trechus</i> |                                     | PP565875 | PP681519 |          |          |          |
| PLW0126           | <i>Trechus</i> | <i>inexpectatus</i>                 | PP565876 | PP681525 |          |          |          |
| PLW0127           | <i>Trechus</i> | <i>schwarzi saludae</i>             | PP565877 |          |          | PP571943 |          |
| PLW0128           | <i>Trechus</i> | <i>schwarzi saludae</i>             | PP565878 | PP681595 |          | PP571944 |          |
| PLW0129           | <i>Trechus</i> | <i>schwarzi saludae</i>             | PP565879 | PP681596 |          | PP571945 |          |
| PLW0130           | <i>Trechus</i> |                                     | PP565880 | PP681557 |          |          |          |
| PLW0131           | <i>Trechus</i> |                                     | PP565881 | PP681470 |          |          |          |
| PLW0132           | <i>Trechus</i> | <i>barberi</i>                      | PP565882 |          |          |          |          |
| PLW0133           | <i>Trechus</i> | <i>barberi</i>                      | PP565883 | PP681471 |          |          |          |
| PLW0134           | <i>Trechus</i> | <i>"luculentus joannabaldensis"</i> | PP565884 |          |          |          |          |
| PLW0135           | <i>Trechus</i> | <i>"luculentus joannabaldensis"</i> | OR174686 | PP681560 |          |          |          |
| PLW0137           | <i>Trechus</i> | <i>"luculentus joannabaldensis"</i> | PP565885 |          |          |          |          |
| PLW0138           | <i>Trechus</i> | <i>"luculentus joannabaldensis"</i> | PP565886 | PP681559 |          |          |          |
| PLW0139           | <i>Trechus</i> | <i>"luculentus joannabaldensis"</i> | PP565887 | PP681558 | PP707777 | PP571930 |          |
| PLW0150           | <i>Trechus</i> | <i>schwarzi scopulosus</i>          | PP565888 | PP681610 |          |          |          |
| PLW0165           | <i>Trechus</i> |                                     | PP565889 |          |          |          |          |
| PLW0166           | <i>Trechus</i> |                                     | PP565890 |          |          |          |          |
| PLW0167           | <i>Trechus</i> | <i>n.sp.1</i>                       | PP565891 |          |          |          | PP681633 |
| PLW0174           | <i>Trechus</i> |                                     | PP565892 |          |          |          |          |

| Extraction Number | Identification        |                       | COI      | Wingless | Topo     | 18S      | 28S      | CAD4     |
|-------------------|-----------------------|-----------------------|----------|----------|----------|----------|----------|----------|
| PLW0175           | <i>Trechus</i>        |                       | PP565893 |          |          |          |          |          |
| PLW0176           | <i>Trechus</i>        |                       | PP565894 |          |          |          |          |          |
|                   | <i>Pseudocnides</i>   | <i>monolcus</i>       |          | MK118583 |          | MK103915 | MK103983 | MK112144 |
|                   | <i>Pseudocnides</i>   | <i>rugosifrons</i>    | OR500900 | MK118685 | OR503086 |          | MK104087 | MK112243 |
|                   | <i>Bothynotrechus</i> | <i>Castelnaui</i>     |          | MK118544 |          |          | MK103943 | MK112102 |
|                   | <i>Eutrechopsis</i>   | <i>ovalis</i>         |          | MK118691 |          |          | MK104093 |          |
|                   | <i>Homaloderodes</i>  | <i>germaini</i>       |          | MK118536 |          |          | GU556096 | MK112091 |
|                   | <i>Kenodactylus</i>   | <i>audouini</i>       |          | GU556043 |          |          | GU556097 | MK112075 |
|                   | <i>Mimotrechus</i>    | <i>scitulus</i>       |          | MK118553 |          |          | MK103952 | MK112110 |
|                   | <i>Nototrechus</i>    | <i>unicolor</i>       |          | MK118547 |          |          | MK103946 | MK112105 |
|                   | <i>Omalodera</i>      | <i>centromaculata</i> |          | MK118683 |          |          | MK104085 | MK112241 |
|                   | <i>Omalodera</i>      | <i>dentimaculata</i>  |          | MK118660 |          |          | MK104063 |          |
|                   | <i>Omalodera</i>      | <i>limbata</i>        |          | GU556049 |          | GU556140 | GU556104 |          |
|                   | <i>Oxytrechus</i>     | <i>cf. lallemandi</i> |          | MK118636 |          |          | MK104039 | MK112197 |
|                   | <i>Oxytrechus</i>     |                       |          | MK118541 |          | MK103902 | MK103941 | MK112096 |
|                   | <i>Oxytrechus</i>     |                       | OR500898 | MK118664 |          |          | MK104067 | MK112222 |
|                   | <i>Tasmanorites</i>   | <i>intermedius</i>    |          | MK118537 |          |          | MK103938 | MK112092 |
|                   | <i>Trechielia</i>     | <i>subornatella</i>   |          | MK118688 |          |          | MK104090 | MK112246 |
|                   | <i>Trechimorphus</i>  | <i>cf. brunneus</i>   |          | MK118554 |          | MK103908 | MK103953 | MK112111 |
|                   | <i>Trechimorphus</i>  | <i>Diemensis</i>      |          | MK118646 |          |          | MK104049 | MK112206 |
|                   | <i>Trechinotus</i>    | <i>flavocinctus</i>   |          | GU556066 |          | GU556149 | GU556125 | MK112069 |
|                   | <i>Trechisibus</i>    | <i>antarcticus</i>    | ON554757 | MK118599 |          |          | MK104002 | MK112163 |
|                   | <i>Trechisibus</i>    |                       | OR500901 | MK118630 | OR503087 |          | MK104033 |          |
|                   | <i>Trechisibus</i>    |                       |          | MK118626 |          |          | MK104029 | MK112188 |
|                   | <i>Trechisibus</i>    |                       |          | MK118581 |          |          | MK103981 | MK112142 |
|                   | <i>Trechisibus</i>    |                       |          | MK118628 |          |          | MK104031 | MK112190 |
|                   | <i>Trechisibus</i>    |                       |          | MK118632 |          |          | MK104035 | MK112193 |
|                   | <i>Tropidotrechus</i> | <i>bawbawensis</i>    | OR500903 | MK118687 |          |          | MK104089 | MK112245 |
|                   | <i>Tropidotrechus</i> | <i>victoriae</i>      | OR50090  | MK118686 | OR503089 |          | MK104088 | MK112244 |
|                   | <i>Aepopsis</i>       | <i>robinii</i>        |          | MK118675 |          |          | MK104078 | MK112233 |
|                   | <i>Agonotrechus</i>   | <i>Wuyipeng</i>       |          |          |          | ON557655 | MK103969 | MK112129 |
|                   | <i>Amerodualius</i>   | <i>Jeanneli</i>       |          | MK118711 |          |          | MK104114 | MK112265 |
|                   | <i>Aphaenops</i>      | <i>cerberus</i>       |          | MK118700 |          | MK103929 | MK104103 | MK112254 |
|                   | <i>Blemus</i>         | <i>discus</i>         |          | MK118678 |          | MK103927 | MK104080 | MK112236 |
|                   | <i>Darlingtonia</i>   | <i>kentuckiensis</i>  |          | MK118708 |          | MK103932 | MK104111 | MK112262 |
|                   | <i>Duvalius</i>       | <i>bolderii</i>       |          | MK118699 |          |          | MK104102 | MK112253 |
|                   | <i>Epaphiopsis</i>    | <i>grebennikovi</i>   |          | MK118710 |          | MK103933 | MK104113 | MK112264 |
|                   | <i>Geotrechus</i>     | <i>orpheus</i>        |          | MK118702 |          |          | MK104105 | MK112256 |

| Extraction Number | Identification                       | COI      | Wingless | Topo     | 18S      | 28S      | CAD4     |
|-------------------|--------------------------------------|----------|----------|----------|----------|----------|----------|
|                   | <i>Iberotrechus bolivari</i>         |          | MK118697 |          |          | MK104100 | MK112251 |
|                   | <i>Mexitrechus cf. michoacanus</i>   |          | MK118680 |          | OR505850 | MK104082 | MK112238 |
|                   | <i>Neaphaenops tellkampfi</i>        |          | MK118712 |          |          | MK104115 | MK112266 |
|                   | <i>Nelsonites jonesi</i>             |          | MK118713 |          |          | MK104116 | MK112267 |
|                   | <i>Paraphaenops breuilianus</i>      |          | MK118703 |          |          | MK104106 | MK112257 |
|                   | <i>Paratrechus halffteri</i>         |          | MK118540 |          |          | GU556107 | MK112095 |
|                   | <i>Paratrechus maddisoni</i>         | OR500899 | MK118635 | OR503085 | OR505851 | MK104038 | MK112196 |
|                   | <i>Pseudanophthalmus engelhardti</i> |          | MK118577 |          |          | MK103977 |          |
|                   | <i>Trechoblemus westcotti</i>        |          | MK118709 |          |          | MK104112 | MK112263 |
|                   | <i>Xenotrechus denticollis</i>       | OR496885 | MK104138 | OR503090 | MK104140 | MK104141 | MK104123 |
|                   | <i>Trechus arizonae</i>              |          | MK118677 |          |          |          | MK112235 |
|                   | <i>Trechus coloradensis</i>          |          | MK118684 |          |          | MK104086 | MK112242 |
|                   | <i>Trechus humboldti</i>             | OR500902 | MK118661 | OR503088 |          | MK104064 | MK112219 |
|                   | <i>Trechus obtusus</i>               |          | MK118656 |          |          | MK104059 | MK112215 |
|                   | <i>Trechus oregonensis</i>           | ON554754 | MK118534 |          |          | AF398673 | MK112070 |
|                   | <i>Trechus obtusus</i>               |          | MK118682 |          |          | MK104084 | MK112240 |
|                   | <i>Trechus rubens</i>                |          | MK118671 |          |          | MK104074 | MK112229 |
|                   | <i>Trechus hydropicus</i>            |          | MK118579 |          |          | MK103979 | MK112140 |
|                   | <i>beutenmuelleri</i>                |          |          |          |          |          |          |

Notes on methodology: Next generation sequencing and read assembly (Illumina and NanoPore) were completed using the methods of Caterino and Recuero 2023 [15]. The BEAST2 tree assembled with TreeAnnotator was the Maximum Clade Credibility tree. Outgroups in this study were trimmed for BEAST2 analysis because of computational limitations. Phylograms for maximum likelihood analysis were the result of a majority-rule consensus analysis.
